# Supplementary material for: Comparison of mononuclear and dinuclear copper(ii) biomimetic complexes: spectroelectrochemical mechanistic study of their catalytic pathways
Source: Royal Society of Chemistry journal article supplement (doi:10.1039/d2dt01610a), 2022-01-01
Supplement: d2dt01610a1.pdf [file d2dt01610a1.pdf]

## Supplementary Information

# Comparison of mononuclear and dinuclear copper(II) biomimetic complexes: Spectroelectrochemical mechanistic study of their catalytic pathways

Milan Sýs<sup>1</sup>, Jana Kocábová<sup>2</sup>, Jitka Klikarová<sup>1</sup>, Miroslav Novák<sup>3</sup>, Robert Jirásko<sup>1</sup>, Michaela Obluková<sup>2</sup>, Tomáš Mikysek<sup>\*1</sup>, Romana Sokolová<sup>\*2</sup>

<sup>1</sup> Department of Analytical Chemistry, Faculty of Chemical Technology, University of Pardubice, Studentská 573, 532 10 Pardubice, Czech Republic

<sup>2</sup> J. Heyrovský Institute of Physical Chemistry of the CAS, Dolejškova 3, 182 23 Prague 8, Czech Republic

<sup>3</sup> Institute of Chemistry and Technology of Macromolecular Materials, Faculty of Chemical Technology, University of Pardubice, Studentská 573, 53210, Pardubice, Czech Republic

## Content:

|                                                                                                                                                                                     |    |
|-------------------------------------------------------------------------------------------------------------------------------------------------------------------------------------|----|
| <b>Scheme S1.</b> Mechanism of tyrosinase catalytic activity                                                                                                                        | 2  |
| <b>Fig. S1.</b> Absorption spectra of 3,5-DTBQ at different concentrations, calibration curve .....                                                                                 | 2  |
| <b>Fig. S2.</b> UV-Vis spectroelectrochemistry of compounds <b>C1</b> (A), <b>C2</b> (B) and <b>C3</b> (C) in 0.1M TBAPF <sub>6</sub> and acetonitrile during their oxidation ..... | 3  |
| <b>Fig. S3.</b> UV-Vis spectroelectrochemistry of 3,5-DTBC in 0.1M TBAPF <sub>6</sub> and acetonitrile .....                                                                        | 4  |
| <b>Table S1.</b> Calculations of minimal energies for catalysts <b>C1</b> , <b>C2</b> and <b>C3</b> intermediates .....                                                             | 5  |
| <b>Fig. S4-6.</b> FTIR spectra of studied <b>C1-C3</b> complexes.....                                                                                                               | 7  |
| <b>Fig. S7.</b> ESI mass spectra of studied <b>C1-C3</b> complexes.....                                                                                                             | 10 |

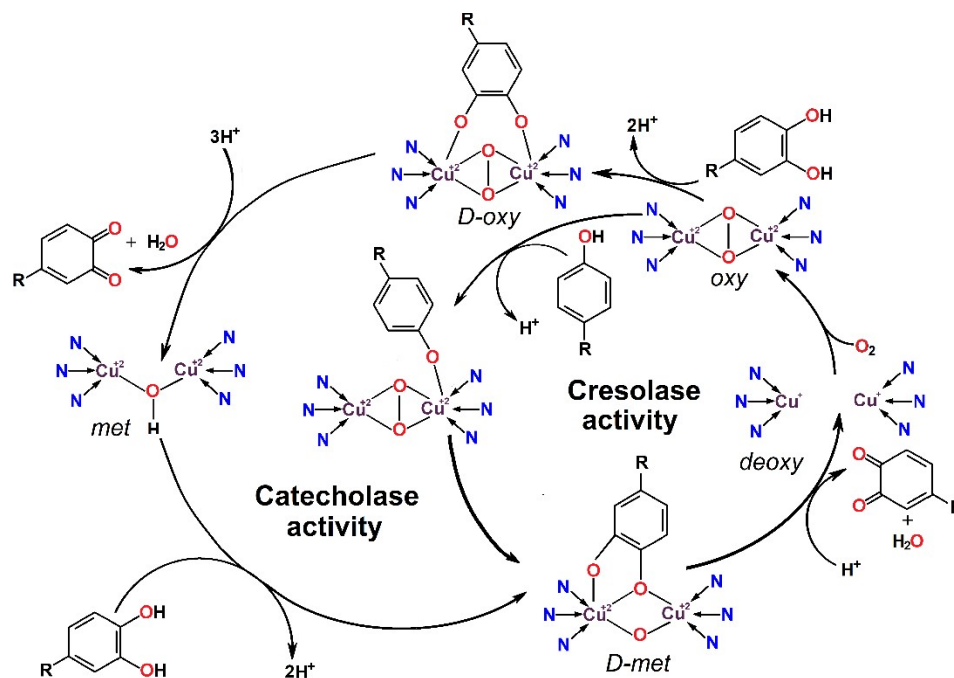

**Scheme S1.** Mechanism of tyrosinase catalytic activity toward oxidation of phenol and catechol according to Hamann J.N. et al. [5].

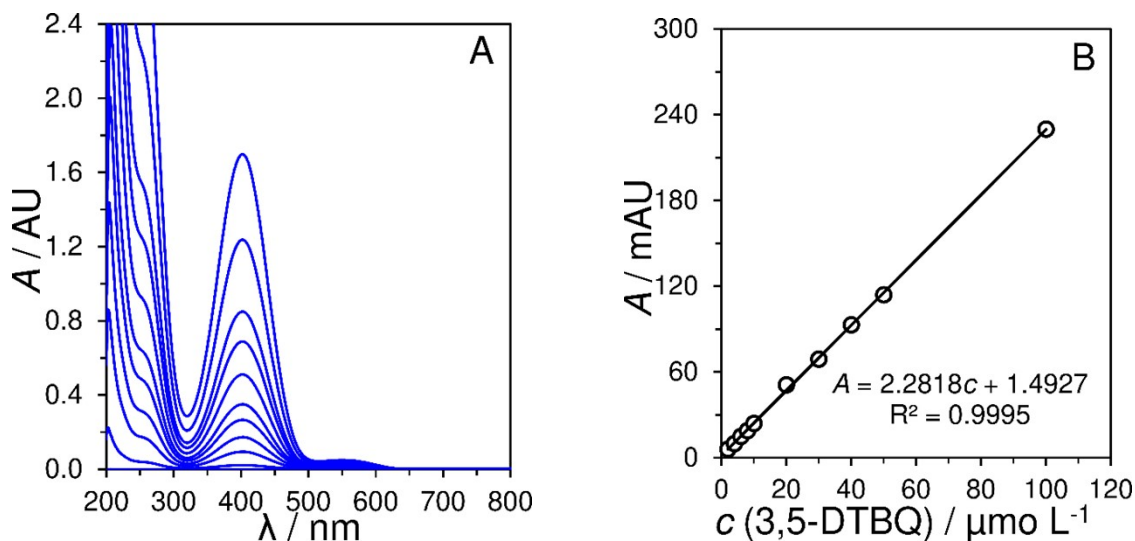

**Fig. S1.** Panel A represents UV-Vis spectra recorded at concentrations 10, 50, 100, 150, 200, 300, 400, 500, 750, 1000 and 1500  $\mu\text{mol L}^{-1}$  of 3,5-DTBQ obtained in pure MeOH containing 0.1  $\text{mol L}^{-1}$   $\text{LiClO}_4$ . Panel B shows the corresponding calibration curve for 3,5-DTBQ spectrophotometric detection at 400 nm.

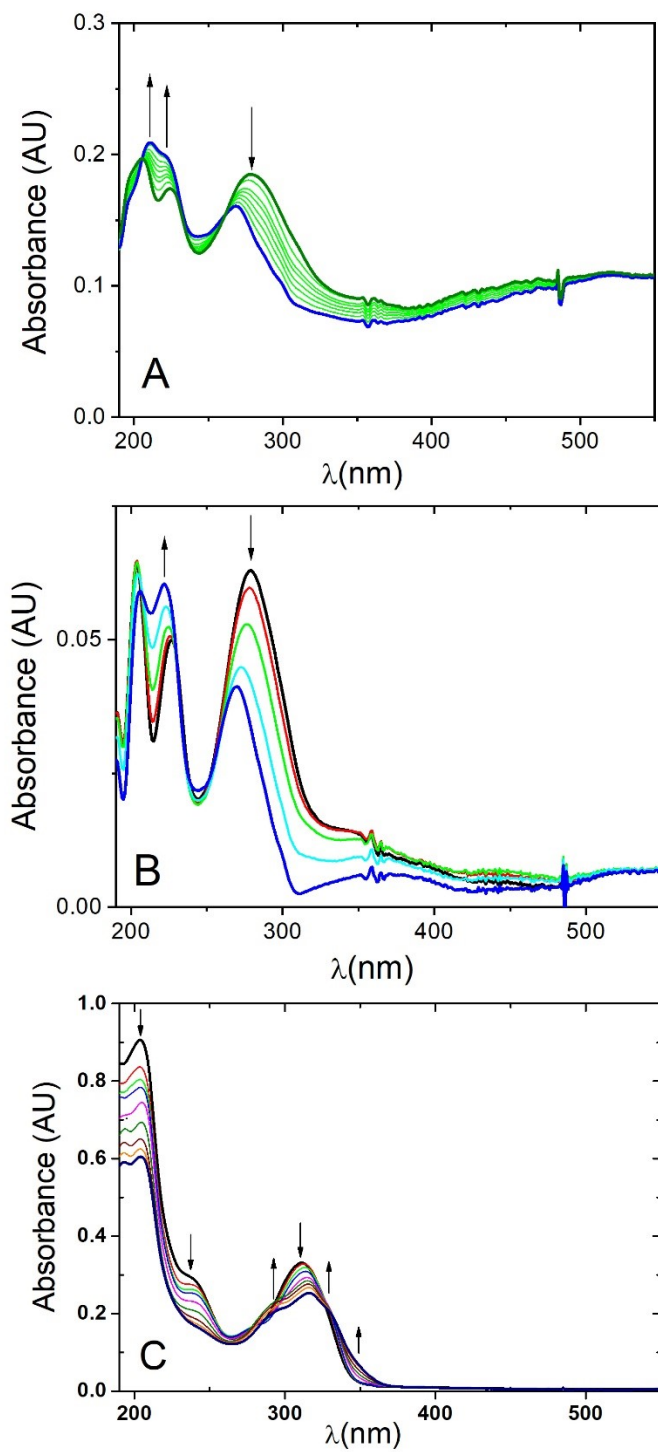

**Fig. S2.** UV-Vis spectroelectrochemistry of compounds **C1** (A), **C2** (B) and **C3** (C) in 0.1M TBAPF<sub>6</sub> and acetonitrile during their irreversible oxidation at 1.7 V.

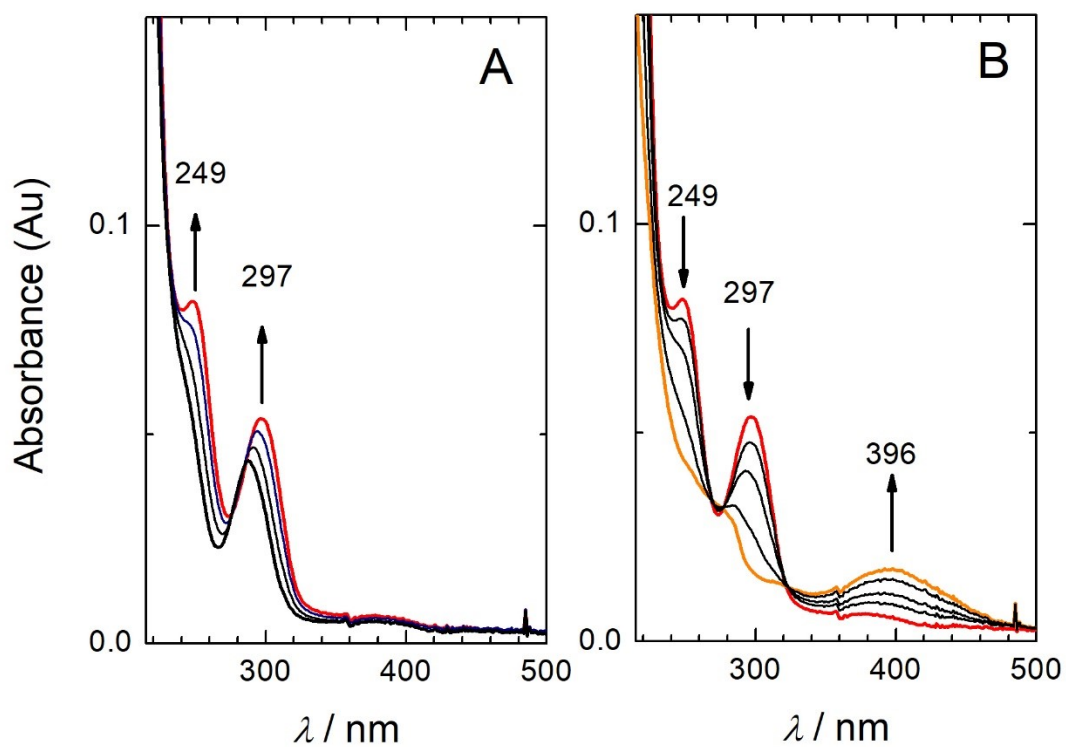

**Fig. S3.** UV-Vis spectroelectrochemistry of 3,5-DTBC during oxidation at potentials -0.45, -0.30, -0.25 and -0.2 V (A) and during continuous oxidation at potentials -0.20, -0.10, 0.05, 0.15, 0.40 V (B) in 0.1M TBAPF<sub>6</sub> and acetonitrile.

**Table S1.** Minimal energies calculated for different possible intermediates of catalysts **C1**, **C2** and **C3** proposed according to literature (Spartan 20', Wavefunction, Inc.).

|                        |                                                                                     |                                                                                     |                                                                                      |
|------------------------|-------------------------------------------------------------------------------------|-------------------------------------------------------------------------------------|--------------------------------------------------------------------------------------|
| C1                     | 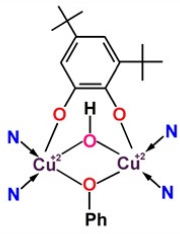   | 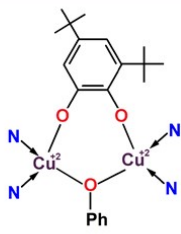   | 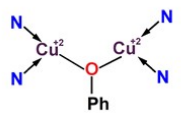   |
| $E_{\min} /$<br>kJ/mol | 1600.5616                                                                           | 1642.8568                                                                           | 814.0016                                                                             |
| C1                     | 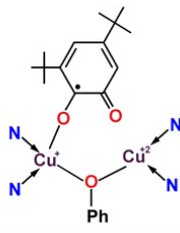   | 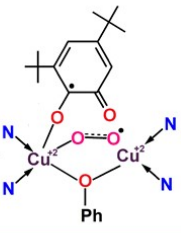   | 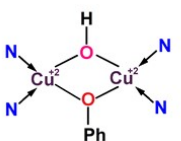   |
| $E_{\min} /$<br>kJ/mol | 1081.6556                                                                           | 442.2633                                                                            | 1274.8432                                                                            |
| C2                     | 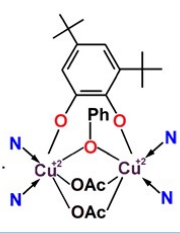  | 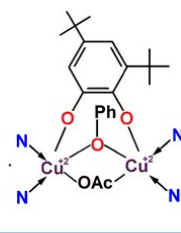  | 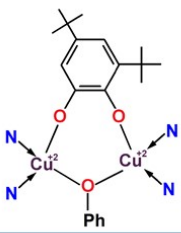  |
| $E_{\min} /$<br>kJ/mol | 919.7124                                                                            | 1748.8729                                                                           | 1642.8568                                                                            |
| C2                     | 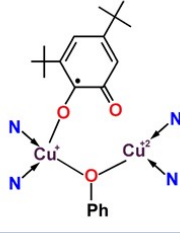 | 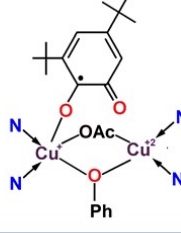 | 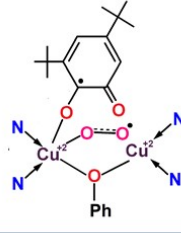 |
| $E_{\min} /$<br>kJ/mol | 1081.6556                                                                           | 1618.3886                                                                           | 442.2633                                                                             |
| C2                     | 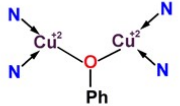 | 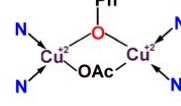 |                                                                                      |
| $E_{\min} /$<br>kJ/mol | 814.0016                                                                            | 1269.0177                                                                           |                                                                                      |

|                        |                                                                                    |                                                                                    |
|------------------------|------------------------------------------------------------------------------------|------------------------------------------------------------------------------------|
| C3                     | 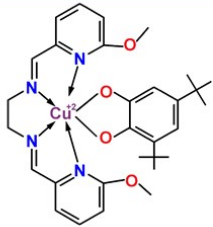  | 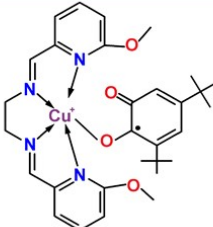  |
| $E_{\min} /$<br>kJ/mol | 780.6402                                                                           | 732.8906                                                                           |
| C3                     | 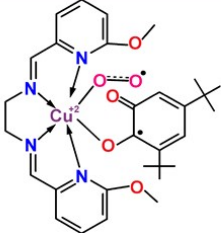  | 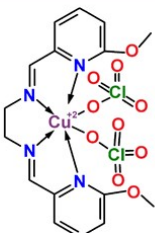  |
| $E_{\min} /$<br>kJ/mol | 184.7303                                                                           | 602.6719                                                                           |
| C3                     | 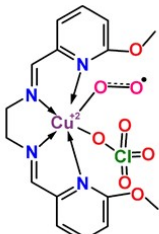 | 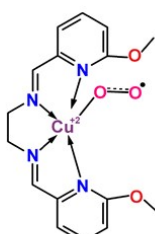 |
| $E_{\min} /$<br>kJ/mol | 472.3717                                                                           | 399.0295                                                                           |

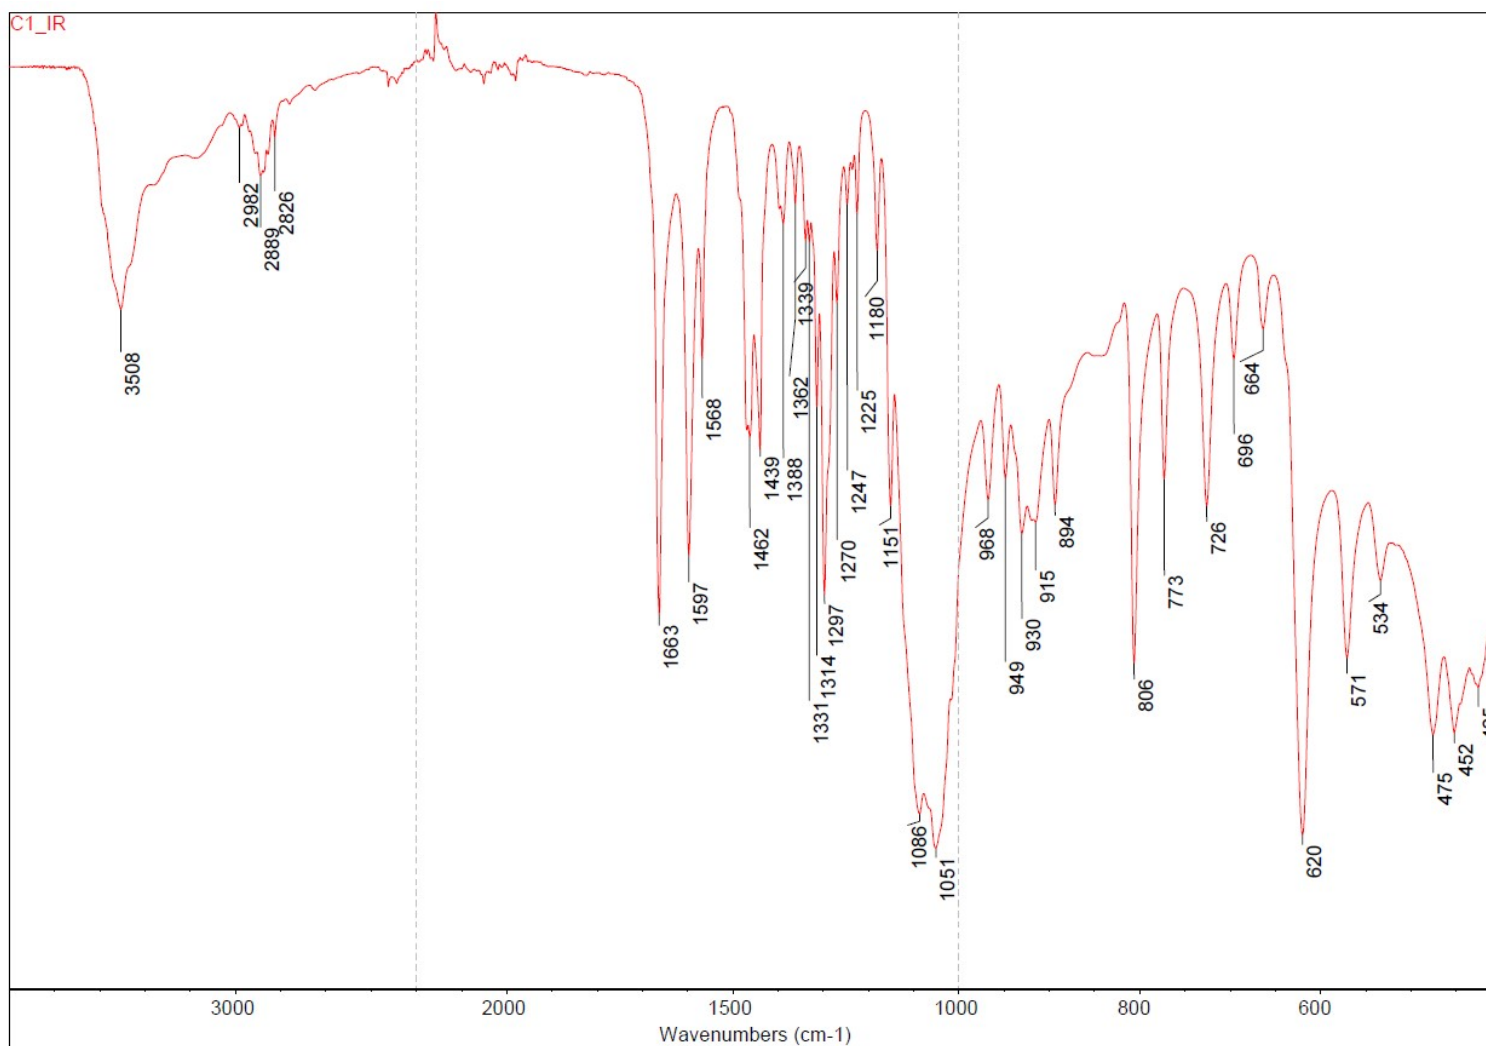

**Fig. S4.** FTIR spectrum of **C1** complex obtained at single-bounce diamond ATR crystal using Nicolet™ iS50 FTIR Spectrometer from Thermo Fisher Scientific™ (Waltham, Massachusetts, USA).

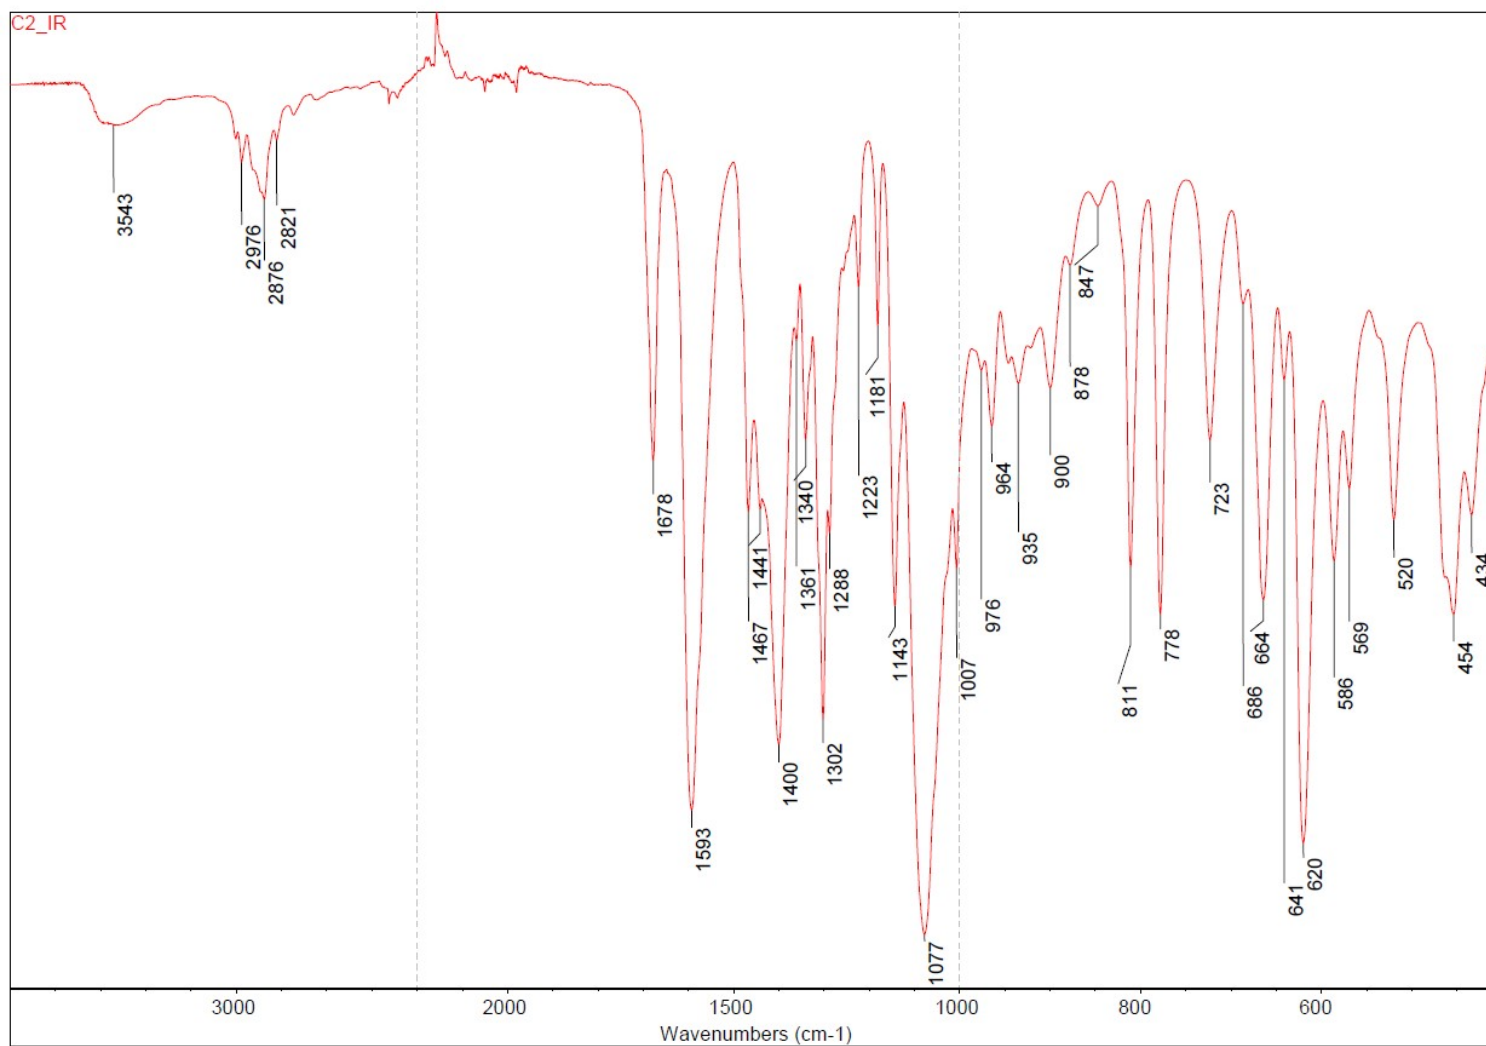

**Fig. S5.** FTIR spectrum of **C2** complex obtained at single-bounce diamond ATR crystal using Nicolet™ iS50 FTIR Spectrometer from Thermo Fisher Scientific™ (Waltham, Massachusetts, USA).

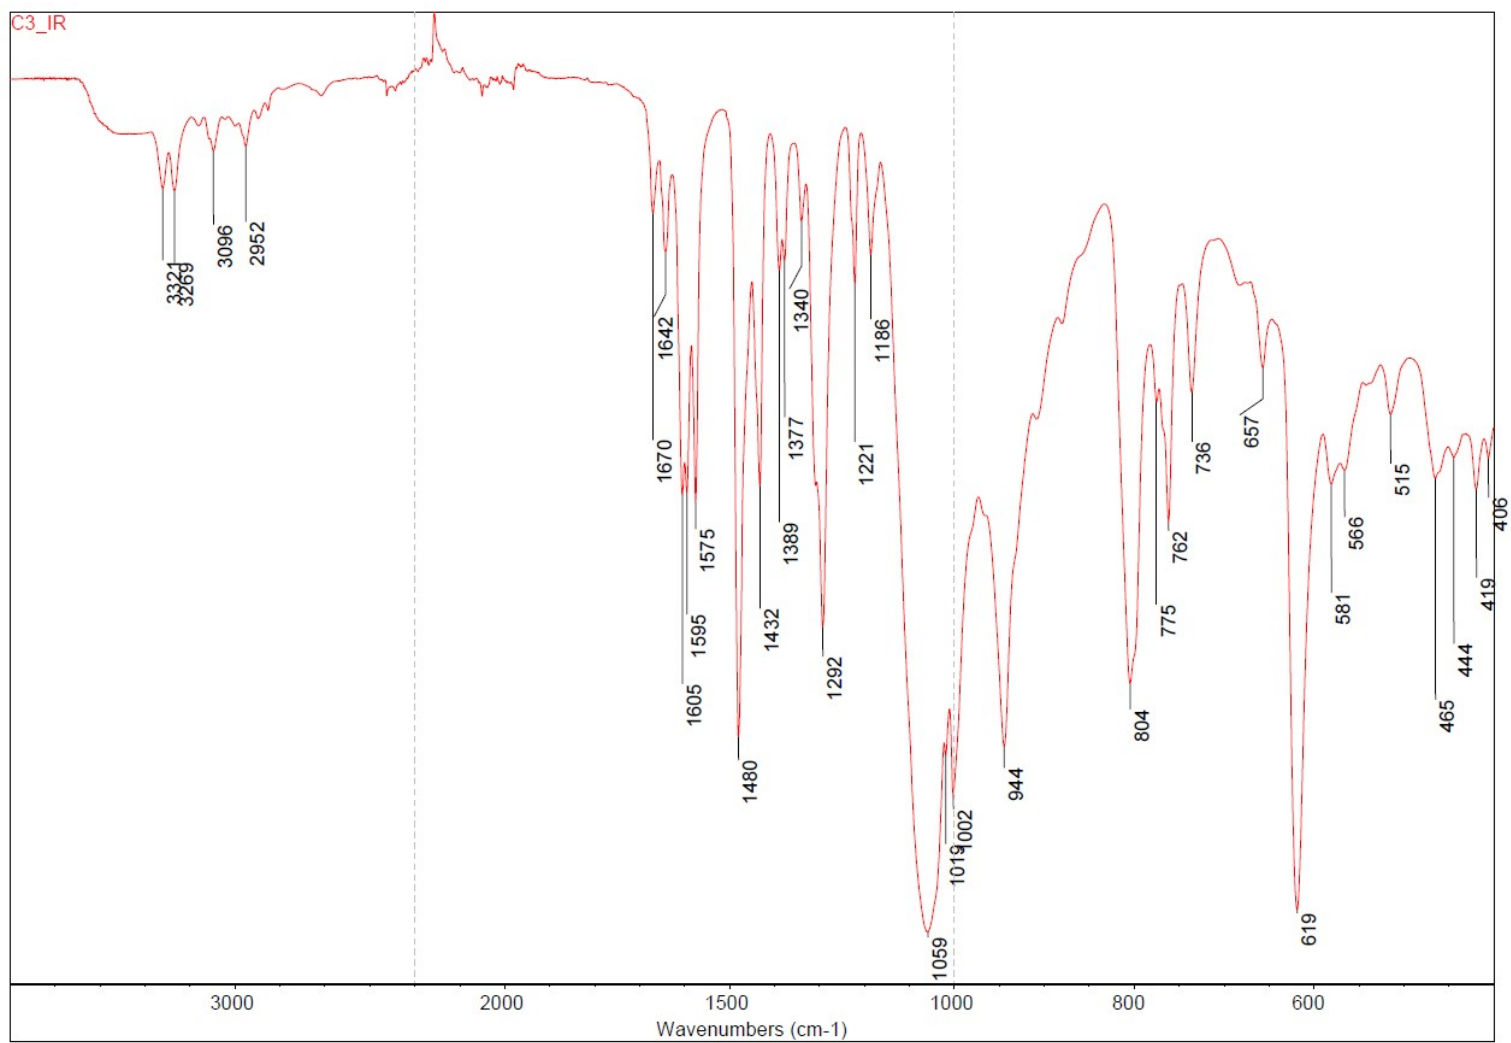

**Fig. S6.** FTIR spectrum of **C3** complex obtained at single-bounce diamond ATR crystal using Nicolet™ iS50 FTIR Spectrometer from Thermo Fisher Scientific™ (Waltham, Massachusetts, USA).

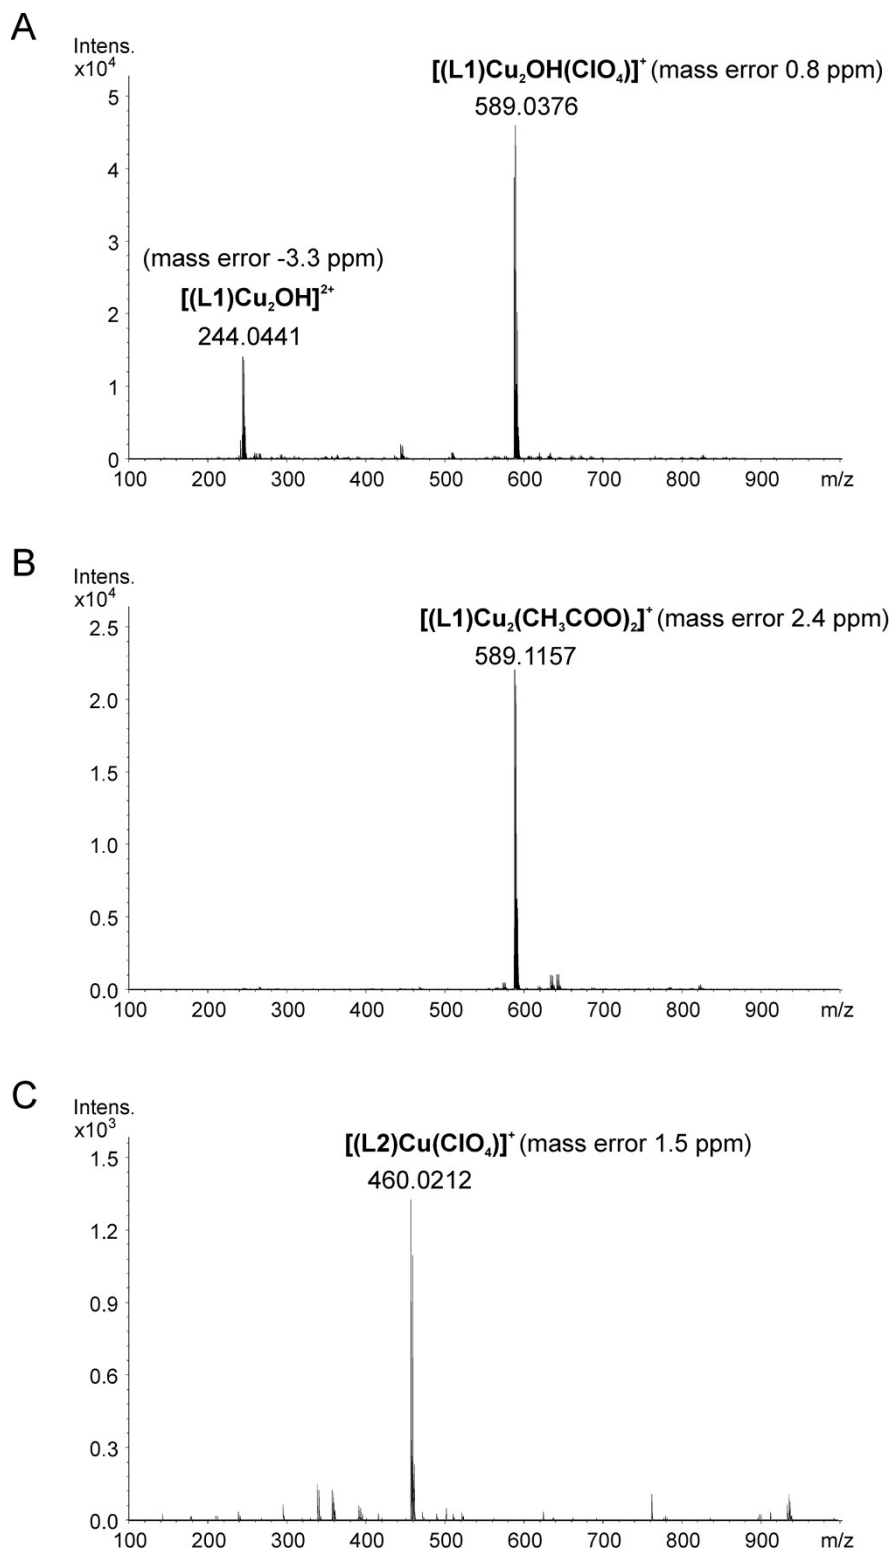

**Fig. S7.** Full scan positive-ion ESI mass spectra of A/ complex **C1**, B/ complex **C2**, and C/ complex **C3** obtained using hybrid quadrupole time of flight mass analyzer (microTOF-Q, Bruker Daltonics, Germany) in positive-ion mode in the range of  $m/z$  100 – 1000. Individual  $m/z$  values correspond to the most abundant ion peak within the characteristic isotopic distribution of annotated ions.
